# Supplementary material for: The Crop Production Capacity of Quinoa (Chenopodium quinoa Willd.)—A New Field Crop for Russia in the Non-Chernozem Zone of Moscow’s Urban Environment
Source: MDPI journal article supplement (doi:10.3390/agronomy12123040), 2022-12-01
Supplement: s1 [file s1]

**Table S1.** The results of two-way ANOVA test to evaluate the significance of quinoa cultivar and agro-climatic conditions of year on the plant height

| Source of variation | ss       | df | ms      | $F_{05}$ | $F$     |
|---------------------|----------|----|---------|----------|---------|
| Total               | 19016.89 | 79 | —       | —        | —       |
| Variants            | 17874.64 | 19 | 940.77  | 1.75     | 49.42*  |
| Factors             |          |    |         |          |         |
| A (cultivar)        | 10728.57 | 4  | 2682.14 | 2.76     | 140.89* |
| B (year)            | 6063.31  | 3  | 2021.10 | 2.53     | 106.16* |
| Interaction (AB)    | 1082.76  | 12 | 90.23   | 1.92     | 4.74*   |
| Error               | 1142.26  | 60 | 19.04   | —        | —       |

Abbreviations: ss – sum of squares; df –degrees of freedom; ms – mean square;  $F_{05}$  – critical F value at 5% significance level ( $\alpha = 0.05$ ); F – F value; \* – F test significant at  $\alpha = 0.05$ .
