# Supplementary material for: The Crop Production Capacity of Quinoa (Chenopodium quinoa Willd.)—A New Field Crop for Russia in the Non-Chernozem Zone of Moscow’s Urban Environment
Source: MDPI journal article supplement (doi:10.3390/agronomy12123040), 2022-12-01
Supplement: s1 [file s1]

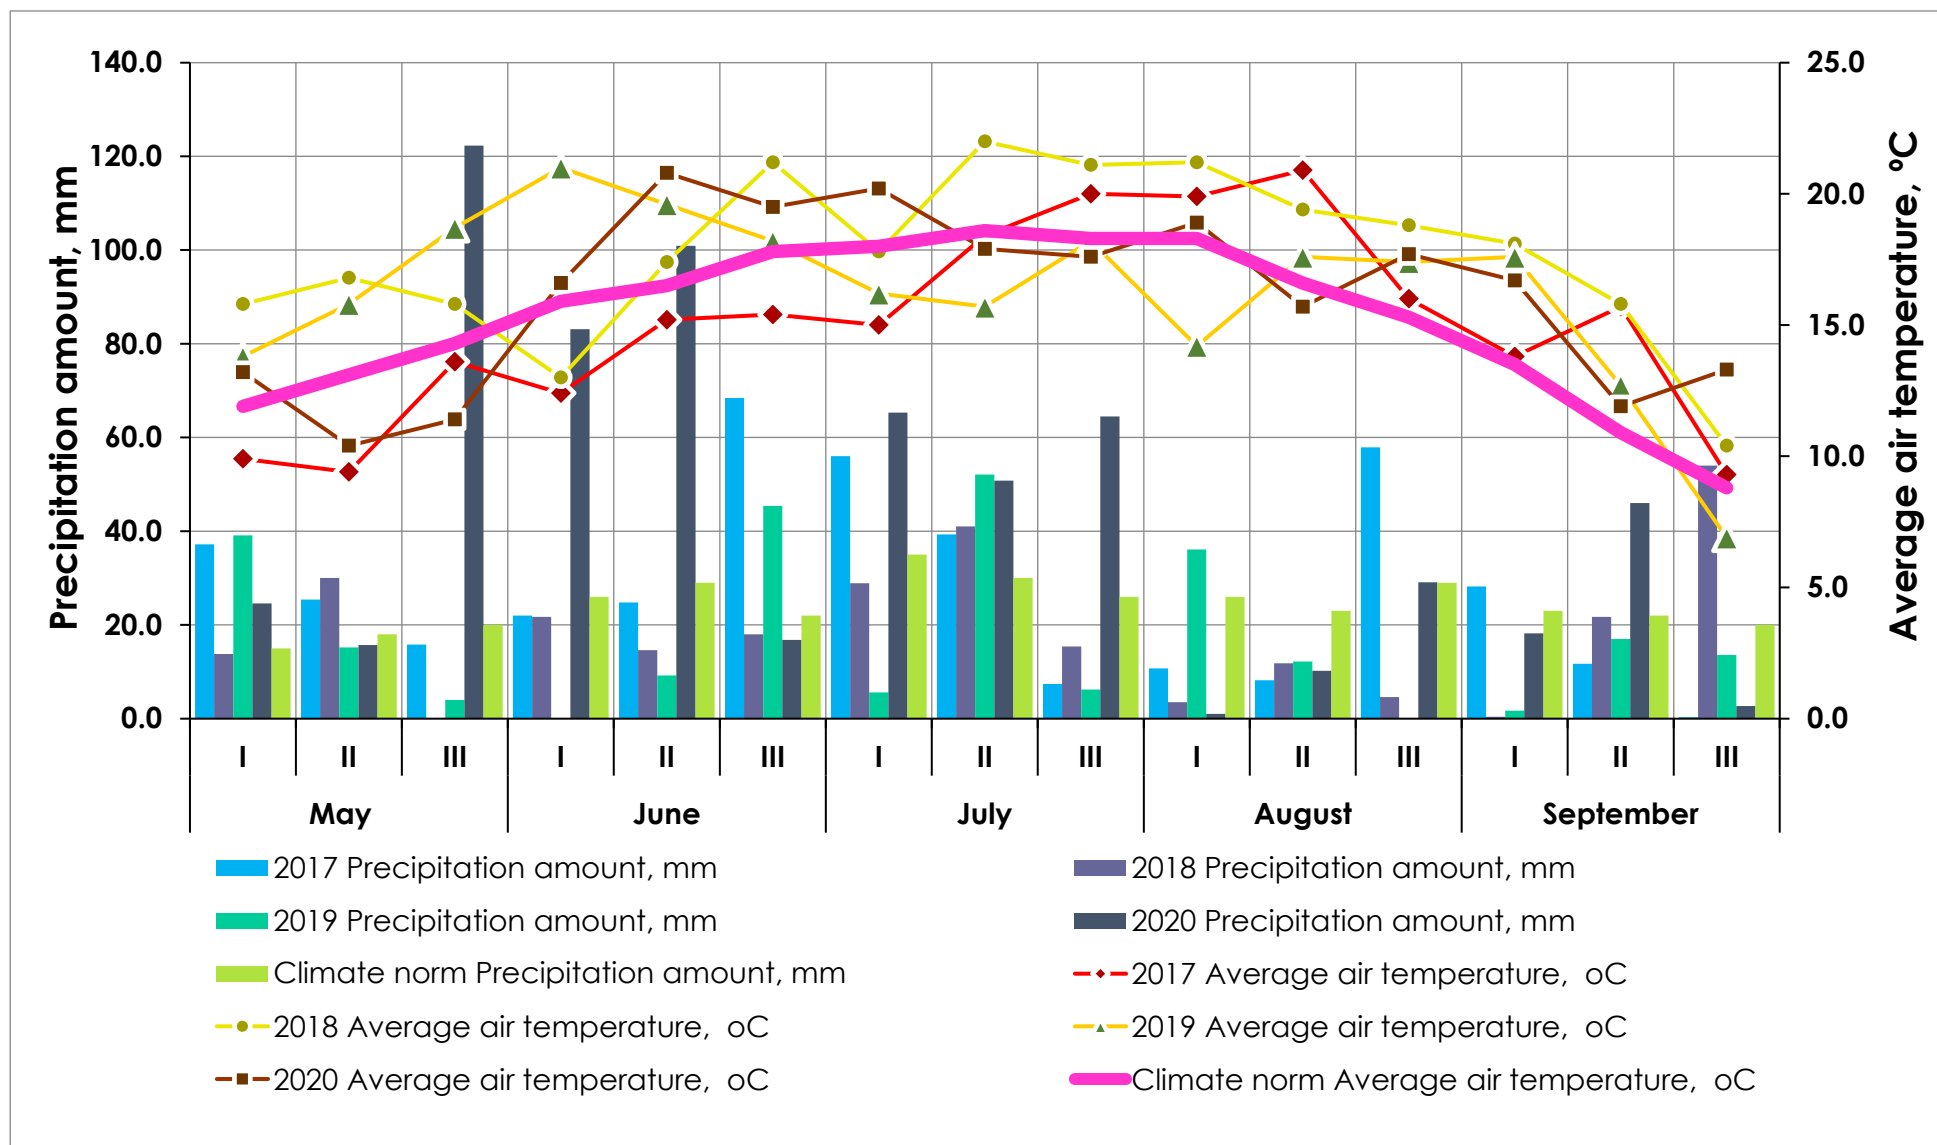

**Figure S1.** Meteorological conditions during the quinoa growing seasons (2017-2020) (data from the V.A. Mikhelson Observatory, Moscow).
