# Supplementary material for: The Crop Production Capacity of Quinoa (Chenopodium quinoa Willd.)—A New Field Crop for Russia in the Non-Chernozem Zone of Moscow’s Urban Environment
Source: MDPI journal article supplement (doi:10.3390/agronomy12123040), 2022-12-01
Supplement: s1 [file s1]

**Table S3.** The results of two-way ANOVA test to evaluate the significance of cultivar and agro-climatic conditions of year on the quinoa yield structure:

a) Grain weight

| Source of variation | ss      | df | ms     | $F_{05}$ | $F$     |
|---------------------|---------|----|--------|----------|---------|
| Total               | 1493.22 | 79 | —      | —        | —       |
| Variants            | 1438.56 | 19 | 75.71  | 1.75     | 83.11*  |
| Factors             |         |    |        |          |         |
| A (cultivar)        | 46.96   | 4  | 11.74  | 2.76     | 12.89*  |
| B (year)            | 1327.21 | 3  | 442.40 | 2.53     | 485.61* |
| Interactions (AB)   | 64.39   | 12 | 5.37   | 1.92     | 5.89*   |
| Error               | 54.66   | 60 | 0.91   | —        | —       |

Abbreviations: ss – sum of squares; df –degrees of freedom; ms – mean square;  $F_{05}$  – critical F value at 5% significance level ( $\alpha = 0.05$ );  $F$  – F value; \* – F test significant at  $\alpha = 0.05$ .

b) Grain amount in the panicle

| Source of variation | ss          | df | ms         | $F_{05}$ | $F$      |
|---------------------|-------------|----|------------|----------|----------|
| Total               | 148045952.0 | 79 | —          | —        | —        |
| Variants            | 146456880.0 | 19 | 7708257.0  | 1.75     | 291.05*  |
| Factors             |             |    |            |          |          |
| A (cultivar)        | 8331899.0   | 4  | 2082974.8  | 2.76     | 78.65*   |
| B (year)            | 115792568.0 | 3  | 38597524.0 | 2.53     | 1457.36* |
| Interactions (AB)   | 22332410.0  | 12 | 1861034.1  | 1.92     | 70.27*   |
| Error               | 1589072.0   | 60 | 26484.5    | —        | —        |

Abbreviations: ss – sum of squares; df –degrees of freedom; ms – mean square;  $F_{05}$  – critical F value at 5% significance level ( $\alpha = 0.05$ );  $F$  – F value; \* – F test significant at  $\alpha = 0.05$ .

c) Thousand-seed weight

| Source of variation | ss    | df | ms   | $F_{05}$ | $F$     |
|---------------------|-------|----|------|----------|---------|
| Total               | 22.34 | 79 | —    | —        | —       |
| Variants            | 21.36 | 19 | 1.12 | 1.75     | 68.68*  |
| Factors             |       |    |      |          |         |
| A (cultivar)        | 2.26  | 4  | 0.56 | 2.76     | 34.45*  |
| B (year)            | 14.45 | 3  | 4.82 | 2.53     | 294.22* |
| Interactions (AB)   | 4.65  | 12 | 0.39 | 1.92     | 23.70*  |
| Error               | 0.98  | 60 | 0.02 | —        | —       |

Abbreviations: ss – sum of squares; df –degrees of freedom; ms – mean square;  $F_{05}$  – critical F value at 5% significance level ( $\alpha = 0.05$ );  $F$  – F value; \* – F test significant at  $\alpha = 0.05$ .
