# Supplementary material for: The Crop Production Capacity of Quinoa (Chenopodium quinoa Willd.)—A New Field Crop for Russia in the Non-Chernozem Zone of Moscow’s Urban Environment
Source: MDPI journal article supplement (doi:10.3390/agronomy12123040), 2022-12-01
Supplement: s1 [file s1]

**Table S2.** The results of two-way ANOVA test to evaluate the significance of quinoa cultivar and agro-climatic conditions of year on the grain yield

| Source of variation | ss    | df | ms    | $F_{05}$ | $F$      |
|---------------------|-------|----|-------|----------|----------|
| Total               | 83.58 | 79 | —     | —        | —        |
| Variants            | 82.72 | 19 | 4.35  | 1.75     | 302.76*  |
| Factors             |       |    |       |          |          |
| A (cultivar)        | 2.69  | 4  | 0.67  | 2.76     | 46.81*   |
| B (year)            | 76.32 | 3  | 25.44 | 2.53     | 1769.13* |
| Interactions (AB)   | 3.71  | 12 | 0.31  | 1.92     | 21.48*   |
| Error               | 0.86  | 60 | 0.01  | —        | —        |

Abbreviations: ss – sum of squares; df –degrees of freedom; ms – mean square;  $F_{05}$  – critical F value at 5% significance level ( $\alpha = 0.05$ ); F – F value; \* – F test significant at  $\alpha = 0.05$ .
